# Supplementary material for: Mode of Delivery and Neonatal Outcomes of Preterm Deliveries: A Retrospective Study in Greece
Source: MDPI journal article supplement (doi:10.3390/medicina60010010), 2023-12-20
Supplement: s1 [file s1]

**Supplementary Table S1.** Comparison of the mode of delivery in different gestational ages according to onset of labor (spontaneous/no labor).

| Gestational Age                          | Mode of Delivery in pregnancies with no onset labor |                  | Univariate Analysis |         |                |
|------------------------------------------|-----------------------------------------------------|------------------|---------------------|---------|----------------|
|                                          | Cesarean Delivery                                   | Vaginal Delivery | <i>p</i> -value     | ORs     | 95% CI         |
| 24 <sup>+0</sup> -27 <sup>+6</sup> weeks | 34 (97.1%)                                          | 1 (2.9%)         | <0.001              | 86.308  | 11.226-663.563 |
| 28 <sup>+0</sup> -31 <sup>+6</sup> weeks | 170 (100%)                                          | 0 (0%)           | <0.001              | 168.052 | 11.120-590.980 |
| 32 <sup>+0</sup> -36 <sup>+6</sup> weeks | 382 (99.2%)                                         | 3 (0.8%)         | <0.001              | 116.969 | 36.802-371.771 |

*Reference: spontaneous onset of labor*

**Supplementary Table S2.** Comparison of the mode of delivery in different gestational ages according to amniotic fluid (PPROM/normal amniotic fluid).

| Gestational Age                          | Mode of Delivery in PPRM |                  | Univariate Analysis |       |             |
|------------------------------------------|--------------------------|------------------|---------------------|-------|-------------|
|                                          | Cesarean Delivery        | Vaginal Delivery | <i>p-value</i>      | ORs   | 95% CI      |
| 24 <sup>+0</sup> -27 <sup>+6</sup> weeks | 14 (70%)                 | 6 (30%)          | 0.032               | 3.094 | 1.105-8.668 |
| 28 <sup>+0</sup> -31 <sup>+6</sup> weeks | 51 (83.6%)               | 10 (16.4%)       | 0.867               | 1.066 | 0.501-2.270 |
| 32 <sup>+0</sup> -36 <sup>+6</sup> weeks | 101 (73.2%)              | 37 (26.8%)       | 0.179               | 1.338 | 0.874-2.049 |

Reference: normal fluid

PPROM: preterm prelabor rupture of membranes

**Supplementary Table S3.** Comparison of the mode of delivery in different gestational ages according to the presence of preeclampsia/HELLP (preeclampsia/HELLP vs no preeclampsia/HELLP).

| Gestational Age                          | Mode of Delivery in pregnancies with preeclampsia/HELLP |                  | Univariate Analysis |               |                     |
|------------------------------------------|---------------------------------------------------------|------------------|---------------------|---------------|---------------------|
|                                          | Cesarean Delivery                                       | Vaginal Delivery | <i>p</i> -value     | ORs           | 95% CI              |
| 24 <sup>+0</sup> -27 <sup>+6</sup> weeks | 8 (100%)                                                | 0 (0%)           | <b>0.016</b>        | <b>9.019</b>  | <b>1.076-75.621</b> |
| 28 <sup>+0</sup> -31 <sup>+6</sup> weeks | 36 (100%)                                               | 0 (0%)           | <b>0.022</b>        | <b>7.500</b>  | <b>1.004-56.011</b> |
| 32 <sup>+0</sup> -36 <sup>+6</sup> weeks | 82 (97.6%)                                              | 2 (2.4%)         | <b>&lt;0.001</b>    | <b>13.811</b> | <b>3.358-56.807</b> |

*Reference: no preeclampsia/HELLP (hemolysis, elevated liver enzymes, low platelets)*

**Supplementary Table S4.** Comparison of the mode of delivery in different gestational ages according to fetal growth (FGR/normal growth).

| Gestational Age                          | Mode of Delivery in FGR |                  | Univariate Analysis |        |               |
|------------------------------------------|-------------------------|------------------|---------------------|--------|---------------|
|                                          | Cesarean Delivery       | Vaginal Delivery | <i>p</i> -value     | ORs    | 95% CI        |
| 24 <sup>+0</sup> -27 <sup>+6</sup> weeks | 3 (75%)                 | 1 (25%)          | 0.259               | 3.474  | 0.352-34.328  |
| 28 <sup>+0</sup> -31 <sup>+6</sup> weeks | 71 (100%)               | 0 (0%)           | <0.001              | 17.241 | 2.338-127.146 |
| 32 <sup>+0</sup> -36 <sup>+6</sup> weeks | 115 (99.1%)             | 1 (0.9%)         | <0.001              | 41.913 | 5.806-302.590 |

Reference: normal growth

FGR: fetal growth restriction

**Supplementary Table S5.** Comparison of the mode of delivery in different gestational ages according to number of fetuses (multiple/singleton pregnancies).

| Gestational Age                          | Mode of Delivery in multiple pregnancies |                  | Univariate Analysis |         |                |
|------------------------------------------|------------------------------------------|------------------|---------------------|---------|----------------|
|                                          | Cesarean Delivery                        | Vaginal Delivery | <i>p</i> -value     | ORs     | 95% CI         |
| 24 <sup>+0</sup> -27 <sup>+6</sup> weeks | 19 (42.2%)                               | 26 (57.8%)       | 0.401               | 0.731   | 0.351-1.521    |
| 28 <sup>+0</sup> -31 <sup>+6</sup> weeks | 104 (100%)                               | 0 (0%)           | <0.001              | 30.900  | 4.206-226.992  |
| 32 <sup>+0</sup> -36 <sup>+6</sup> weeks | 224 (99.6%)                              | 1 (0.4%)         | <0.001              | 108.606 | 15.095-781.421 |

Reference: singleton pregnancy

**Supplementary Table S6.** Comparison of the mode of delivery in different gestational ages according to fetal presentation (non-cephalic/cephalic presentation).

| Gestational Age                          | Mode of Delivery in non-cephalic presentation |                  | Univariate Analysis |        |               |
|------------------------------------------|-----------------------------------------------|------------------|---------------------|--------|---------------|
|                                          | Cesarean Delivery                             | Vaginal Delivery | <i>p</i> -value     | ORs    | 95% CI        |
| 24 <sup>+0</sup> -27 <sup>+6</sup> weeks | 12 (92.3%)                                    | 1 (7.7%)         | <0.001              | 16.500 | 2.075-131.231 |
| 28 <sup>+0</sup> -31 <sup>+6</sup> weeks | 27 (100%)                                     | 0 (0%)           | 0.019               | 5.368  | 0.712-40.466  |
| 32 <sup>+0</sup> -36 <sup>+6</sup> weeks | 64 (100%)                                     | 0 (0%)           | <0.001              | 20.700 | 2.848-150.445 |

Reference: cephalic presentation

**Supplementary Table S7.** Comparison of the mode of delivery in different gestational ages according to fetal status (fetal distress/no fetal distress).

| Gestational Age                          | Mode of Delivery in pregnancies with fetal distress |                  | Univariate Analysis |        |               |
|------------------------------------------|-----------------------------------------------------|------------------|---------------------|--------|---------------|
|                                          | Cesarean Delivery                                   | Vaginal Delivery | <i>p</i> -value     | ORs    | 95% CI        |
| 24 <sup>+0</sup> -27 <sup>+6</sup> weeks | 23 (79.3%)                                          | 6 (20.7%)        | <0.001              | 6.320  | 2.355-16.956  |
| 28 <sup>+0</sup> -31 <sup>+6</sup> weeks | 120 (100%)                                          | 0 (0%)           | <0.001              | 39.409 | 5.368-289.307 |
| 32 <sup>+0</sup> -36 <sup>+6</sup> weeks | 115 (99.1%)                                         | 1 (0.9%)         | <0.001              | 42.009 | 5.819-303.282 |

Reference: no fetal distress
